# Supplementary material for: Controllable synthesis of an intercalated SnS2/aEG structure for enhanced NO2 gas sensing performance at room temperature
Source: Royal Society of Chemistry journal article supplement (doi:10.1039/d0nj01005g), 2020-01-01
Supplement: d0nj01005g1.pdf [file d0nj01005g1.pdf]

## Supporting Information

### Controllable synthesis of an intercalated SnS<sub>2</sub>/aEG structure for enhanced NO<sub>2</sub> gas sensing performance at room temperature

Laifeng Ma<sup>a</sup>, Xueyi Zhang<sup>b</sup>, Jue Wang<sup>a</sup>, Muhammad Ikram<sup>a</sup>, Mohib Ullah<sup>a</sup>, He Lv<sup>a</sup>, Hongyuan Wu<sup>\*c</sup>, Keying Shi<sup>\*a</sup>

<sup>a</sup>Key Laboratory of Functional Inorganic Material Chemistry, Ministry of Education. School of Chemistry and Material Science, Heilongjiang University, Harbin, 150080, P. R. China.

<sup>b</sup>College of Food Science, Northeast Agricultural University, Harbin 150030, P. R. China.

<sup>c</sup>College of Chemistry and Chemical Engineering, Qiqihar University, Qiqihar 161006, P. R. China.

\*Corresponding author: Tel.: +86 13100998185; +86 451 86604920

E-mail: whyhht1972@163.com, shikeying2008@163.com

**Abstract:** Supporting information provide: (i) XRD diffraction patterns of aEG, (ii) FT-IR spectra of SnS<sub>2</sub>/aEG-IV and PVP, (iii) Raman spectra of aEG and SnS<sub>2</sub>/aEG-IV, (iv) TEM image of flower like SnS<sub>2</sub>, (v) EDS elemental mapping of the SnS<sub>2</sub>/aEG-III, (vi) SEM images of SnS<sub>2</sub>/aEG-IV, (vii) HRTEM images of SnS<sub>2</sub>/aEG-III, (viii) Fitted impedance parameters all of the samples, (ix) The gas sensing properties of SnS<sub>2</sub>/aEG-III compared with the references based on SnS<sub>2</sub>, (x) XPS spectra of the pristine SnS<sub>2</sub>, aEG, SnS<sub>2</sub>/aEG-III and of the used SnS<sub>2</sub>/aEG-III NC, (xi) Dynamical response transient of the pristine aEG, SnS<sub>2</sub>, SnS<sub>2</sub>/aEG-I, SnS<sub>2</sub>/aEG-II and SnS<sub>2</sub>/aEG-IV NCs, (xii) Table of the comparative response and response/recovery time of all the samples, (xiii) The calibration curve and the reproducibility of SnS<sub>2</sub>/aEG-III, (xiv) FT-IR informations of vibration of PVP, (xv) Humidity test on SnS<sub>2</sub>/aEG-III, (xv) A diagram of the delivery system for the gas sensing and humidity test.

## Table of contents

S-1 Cover page

S-2 Table of contents

S-3 **Table S1** The comparison of SnS<sub>2</sub> based NO<sub>2</sub> sensor developed in this paper with previous sensors.

S-4 **Fig. S1 and Fig. S2** XRD diffraction pattern and Raman spectrum of aEG; FT-IR spectrum and Raman spectrum of SnS<sub>2</sub>/aEG-IV.

S-5 **Fig. S3 and Table S2** FT-IR spectra, wavenumber, assignment, and mode of vibration of PVP.

S-6 **Fig. S4, Fig. S5 and Fig. S6** TEM image of flower like SnS<sub>2</sub>; EDS image of SnS<sub>2</sub>/aEG-III, EDS elemental mapping of the SnS<sub>2</sub>/aEG-III; SEM images of SnS<sub>2</sub>/aEG-IV.

S-7 **Fig. S7** Enlarged TEM image of 4h and 4i in the text.

S-8 **Table S3 and Table S4** The comparative XPS peak positions of the pure SnS<sub>2</sub>, aEG, fresh SnS<sub>2</sub>/aEG-III and of the used SnS<sub>2</sub>/aEG-III nanocomposites; Fitted impedance parameters of the sample.

S-9 **Fig. S8** Dynamic response-recovery curve of (a) SnS<sub>2</sub>/aEG-I, (b) SnS<sub>2</sub>/aEG-II, (c) SnS<sub>2</sub>/aEG-IV and (d) SnS<sub>2</sub> to NO<sub>2</sub> gas at room temperature.

S-10 **Table S5 and Fig. S9** Response, response time and recovery time of the sensors to NO<sub>2</sub> at room temperature in 30 % humidity; The calibration curve of SnS<sub>2</sub>/aEG-III to 0.01-100 ppm NO<sub>2</sub>; The reproducibility of the SnS<sub>2</sub>/aEG-III sensor.

S-11 **Fig. S10 and Fig. S11** Dynamic response-recovery curve of aEG; Response-recovery curves of the SnS<sub>2</sub>/aEG-III to 100 ppm NO<sub>2</sub> gas in different relative humidity at RT.

S-12 **Fig. S12** A diagram of the delivery system for the gas sensing and humidity test.

**Table S1** Comparison of NO<sub>2</sub> Sensing Performance of the SnS<sub>2</sub>-based Sensor developed in this work with the previous ones.

| Sample                                                          | Working temperature/°C | NO <sub>2</sub> concentration /ppm | Sensitivity | Response /Recovery time | Refs.    |
|-----------------------------------------------------------------|------------------------|------------------------------------|-------------|-------------------------|----------|
| SnS <sub>2</sub>                                                | 120                    | 10                                 | ~36         | —                       | [22]     |
| SnO <sub>2</sub> /SnS <sub>2</sub>                              | 100                    | 1                                  | 51.1        | 299s/143s               | [23]     |
| SnS <sub>2</sub>                                                | 120                    | 0.1                                | 5.7         | —                       | [24]     |
| SnS <sub>2</sub>                                                | 250                    | 10                                 | ~15         | 6s/40s                  | [25]     |
| SnO <sub>2</sub> /SnS <sub>2</sub>                              | 80                     | 8                                  | 5.3         | 159s/297s               | [26]     |
| SnS <sub>2</sub> -reduced graphene oxide                        | 80                     | 0.6                                | ~1          | >5min                   | [27]     |
| SnS <sub>2</sub> Nanograins on Porous SiO <sub>2</sub> Nanorods | RT                     | 10                                 | ~7          | —                       | [28]     |
| SnS <sub>2</sub> /aEG-III                                       | RT                     | 100                                | 21.19       | 0.53s/<br>51.73s        | Our work |

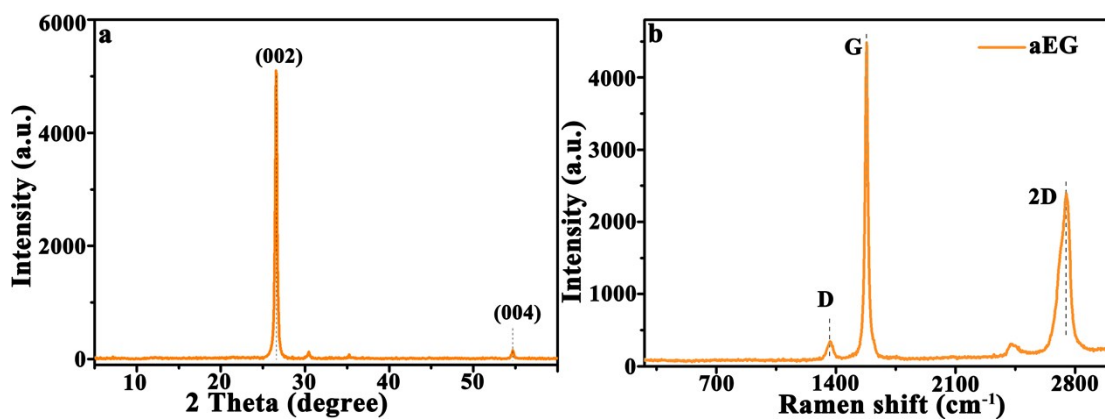

Fig. S1 XRD diffraction pattern (a) and Raman spectrum (b) of aEG.

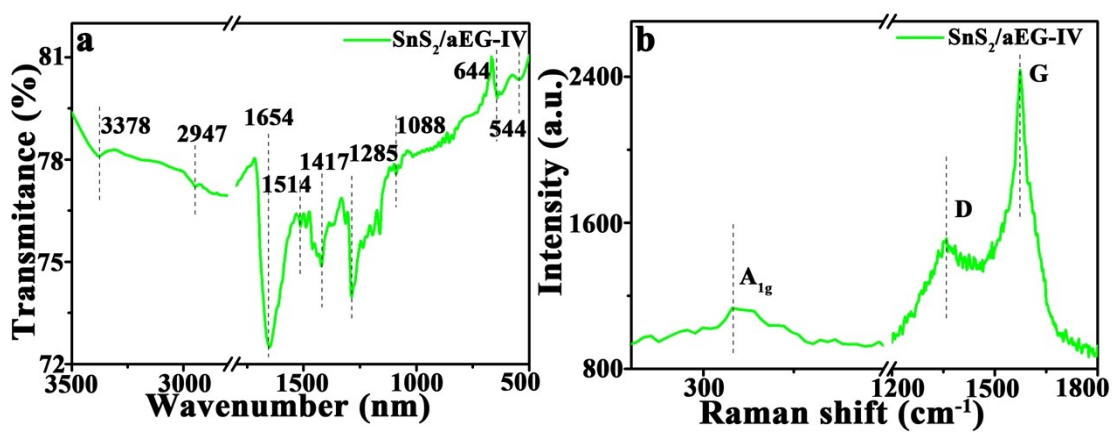

Fig. S2 (a) FT-IR spectrum and (b) Raman spectrum of SnS<sub>2</sub>/aEG-IV.

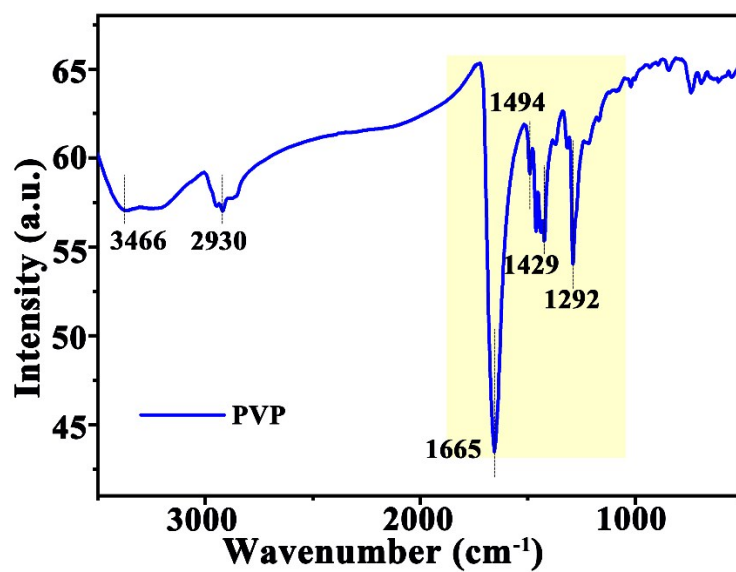

Fig. S3 Spectra of FT-IR of PVP.

Table S2 FT-IR Wavenumber, assignment, and mode of vibration of PVP.

| Wavenumber / cm <sup>-1</sup> | Assignment                | Vibration mode          |
|-------------------------------|---------------------------|-------------------------|
| ~3466                         | H <sub>2</sub> O combined | Stretching O-H          |
| ~2930                         | CH <sub>2</sub>           | Bending C-H             |
| ~1665                         | C=O                       | Stretching C-O          |
| ~1494                         | CH <sub>2</sub>           | Bending CH <sub>2</sub> |
| ~1429                         | CH <sub>2</sub>           | Bending CH <sub>2</sub> |
| ~1292                         | C-N                       | Stretching C-N          |

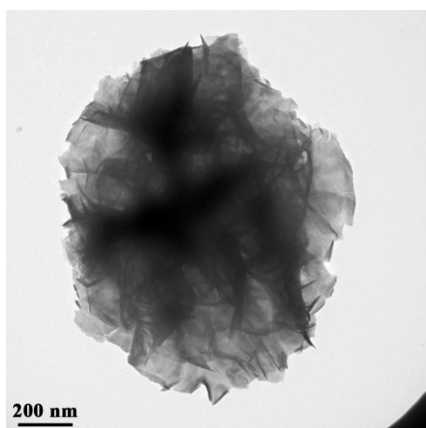

Fig. S4 TEM image of the flower like SnS<sub>2</sub>.

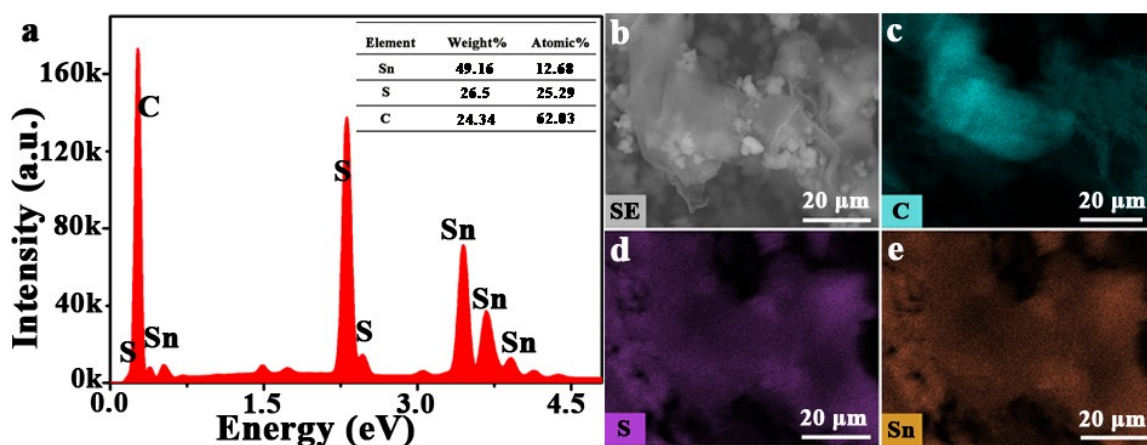

Fig. S5 (a) EDS image of SnS<sub>2</sub>/aEG-III; EDS elemental mapping of the SnS<sub>2</sub>/aEG-III (b) for C (c) S (d) and Sn (e) elements.

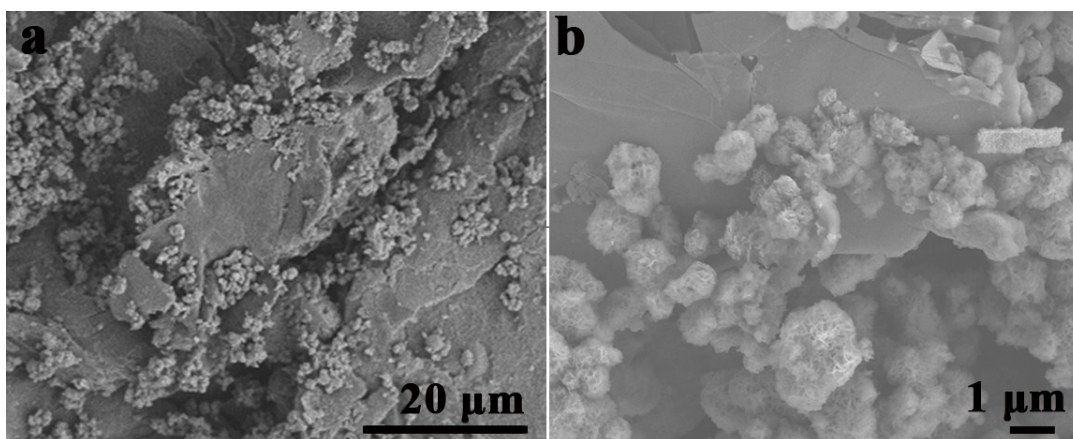

Fig. S6 SEM images of SnS<sub>2</sub>/aEG-IV.

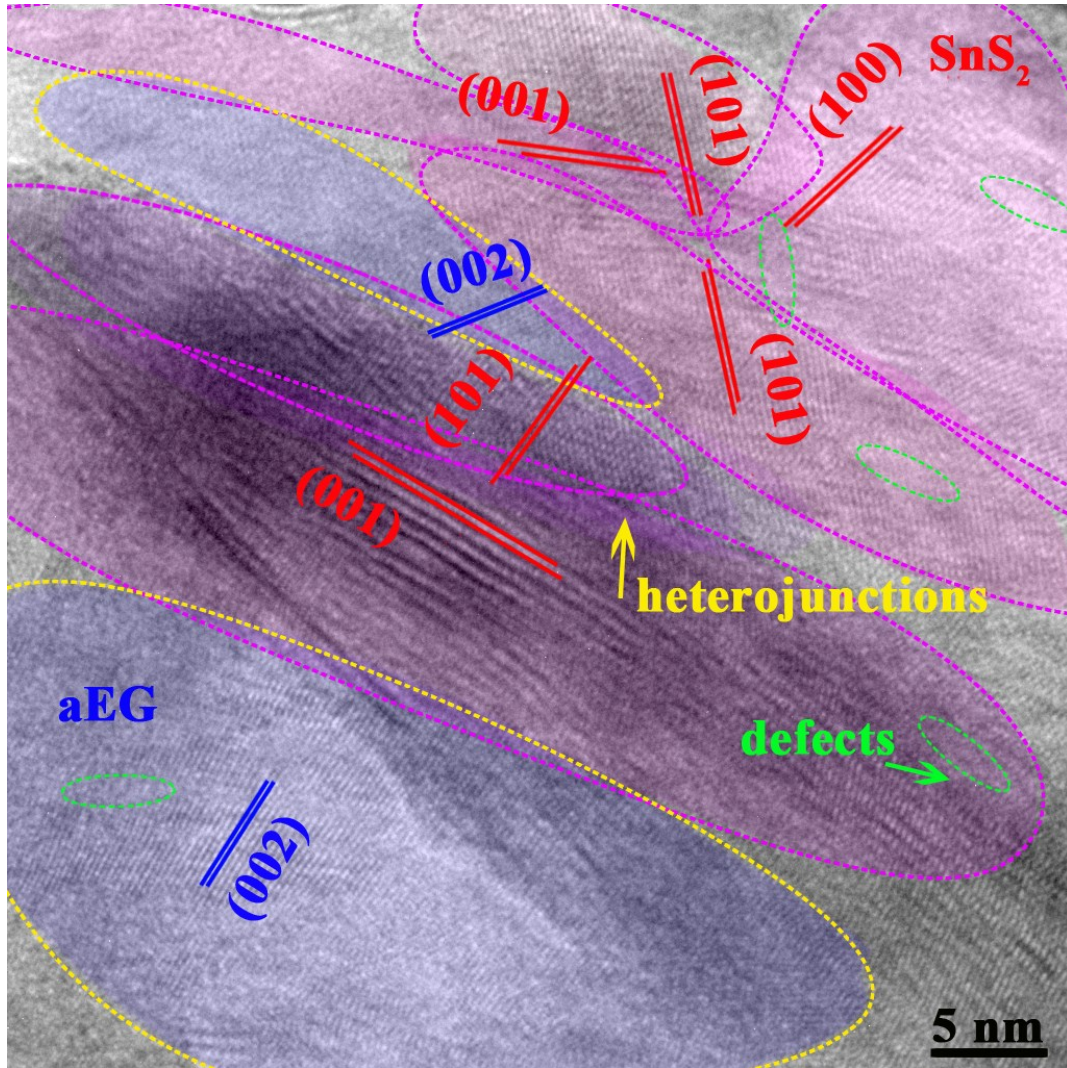

Fig. S7 Enlarged view of 4h and 4i in text.

**Table S3** The comparative XPS peak positions of the pure SnS<sub>2</sub>, aEG, fresh SnS<sub>2</sub>/aEG-III and of the used SnS<sub>2</sub>/aEG-III NCs

|                                   | Binding energy (eV)                        |                                           |        |
|-----------------------------------|--------------------------------------------|-------------------------------------------|--------|
|                                   | Sn (3d <sub>5/2</sub> /3d <sub>3/2</sub> ) | S (2p <sub>3/2</sub> /2p <sub>1/2</sub> ) | C 2s   |
| SnS <sub>2</sub>                  | 487.16/495.60                              | 163.39/162.21                             | —      |
| aEG                               | —                                          | —                                         | 284.65 |
| SnS <sub>2</sub> /aEG-III (fresh) | 487.23/495.65                              | 163.45/162.35                             | 284.60 |
| SnS <sub>2</sub> /aEG-III (used)  | 487.30/495.69                              | 163.40/162.25                             | 284.66 |

**Table S4** Fitted impedance parameters of the samples

| Samples             | SnS <sub>2</sub> | aEG | SnS <sub>2</sub> /aEG-III |
|---------------------|------------------|-----|---------------------------|
| R <sub>Ω</sub> (Ω)  | 34               | 26  | 18                        |
| R <sub>ct</sub> (Ω) | 1483             | 380 | 153                       |



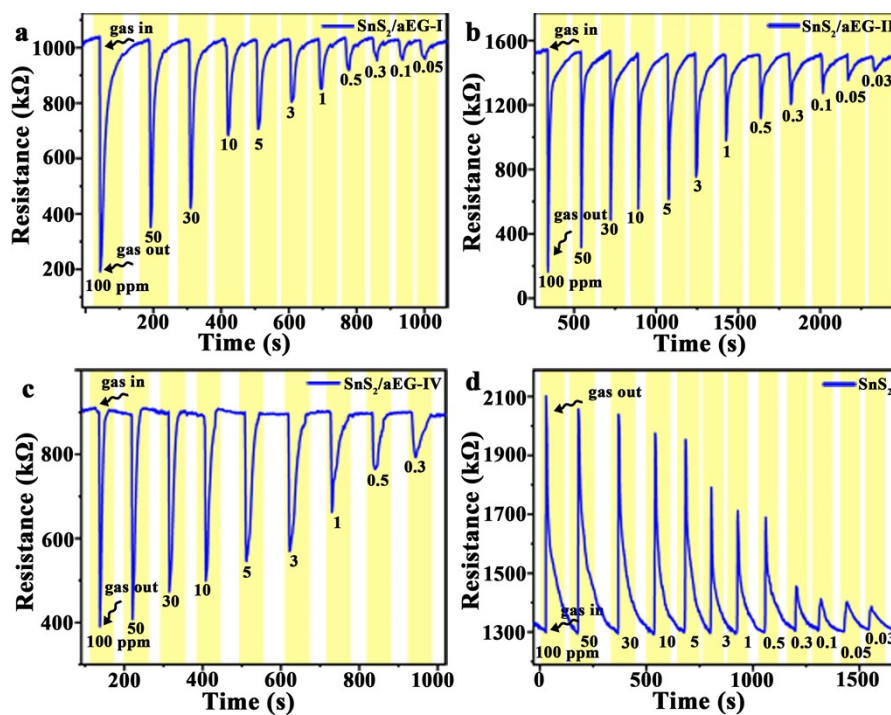

**Fig. S8** Dynamical response transient of (a) SnS<sub>2</sub>/aEG-I, (b) SnS<sub>2</sub>/aEG-II, (c) SnS<sub>2</sub>/aEG-IV and (d) SnS<sub>2</sub> to NO<sub>2</sub> gas at room temperature.

**Table S5** Response, response time and recovery time of the sensors to NO<sub>2</sub> at room temperature in 30 % humidity.

| NO <sub>2</sub><br>(ppm) | SnS <sub>2</sub> /aEG-III      |                  |                  | SnS <sub>2</sub> /aEG-II       |                  |                  | SnS <sub>2</sub> /aEG-I        |                  |                  | SnS <sub>2</sub>               |                  |                  |
|--------------------------|--------------------------------|------------------|------------------|--------------------------------|------------------|------------------|--------------------------------|------------------|------------------|--------------------------------|------------------|------------------|
|                          | R <sub>a</sub> /R <sub>g</sub> | t <sub>res</sub> | t <sub>rec</sub> | R <sub>a</sub> /R <sub>g</sub> | t <sub>res</sub> | t <sub>rec</sub> | R <sub>a</sub> /R <sub>g</sub> | t <sub>res</sub> | t <sub>rec</sub> | R <sub>a</sub> /R <sub>g</sub> | t <sub>res</sub> | t <sub>rec</sub> |
| 100                      | 21.19                          | 0.53             | 51.73            | 10.65                          | 1.07             | 93.33            | 6.14                           | 1.07             | 72.53            | 3.04                           | 1.07             | 81.60            |
| 50                       | 13.39                          | 0.53             | 58.13            | 5.17                           | 1.07             | 93.87            | 5.79                           | 1.07             | 74.67            | 2.70                           | 1.07             | 78.93            |
| 30                       | 9.98                           | 1.07             | 56.53            | 3.22                           | 1.60             | 86.40            | 5.51                           | 1.07             | 76.27            | 2.66                           | 1.60             | 98.67            |
| 10                       | 7.93                           | 1.07             | 50.67            | 2.73                           | 3.20             | 94.93            | 5.17                           | 1.07             | 77.33            | 2.64                           | 1.60             | 89.07            |
| 5                        | 5.94                           | 1.07             | 44.80            | 2.42                           | 3.73             | 85.33            | 2.93                           | 2.13             | 60.27            | 2.20                           | 3.20             | 72.00            |
| 3                        | 5.35                           | 1.60             | 48.00            | 2.13                           | 5.33             | 89.60            | 2.47                           | 2.13             | 56.53            | 2.15                           | 3.73             | 59.20            |
| 1                        | 4.00                           | 2.13             | 51.20            | 1.64                           | 5.87             | 95.47            | 1.48                           | 2.67             | 59.20            | 1.68                           | 3.73             | 62.40            |
| 0.5                      | 2.50                           | 3.20             | 44.27            | 1.48                           | 8.00             | 94.40            | 1.28                           | 4.27             | 41.60            | 1.53                           | 3.73             | 67.20            |
| 0.3                      | 2.40                           | 3.20             | 42.67            | 1.39                           | 9.60             | 82.67            | 1.21                           | 4.27             | 37.87            | 1.47                           | 4.27             | 73.60            |
| 0.1                      | 1.50                           | 3.20             | 38.40            | 1.28                           | 10.13            | 78.93            | 1.13                           | 5.33             | 38.93            | 1.14                           | 4.27             | 56.00            |
| 0.05                     | 1.22                           | 3.73             | 34.67            | 1.27                           | 10.13            | 61.87            | 1.09                           | 5.87             | 35.20            | 1.09                           | 5.87             | 58.13            |
| 0.03                     | 1.09                           | 4.80             | 30.93            | 1.23                           | 11.73            | 62.93            |                                |                  |                  | 1.07                           | 6.40             | 51.20            |
| 0.01                     | 1.04                           | 8.53             | 18.13            |                                |                  |                  |                                |                  |                  |                                |                  |                  |

t<sub>res</sub> = Response Time (s), t<sub>rec</sub> = Recovery Time (s)

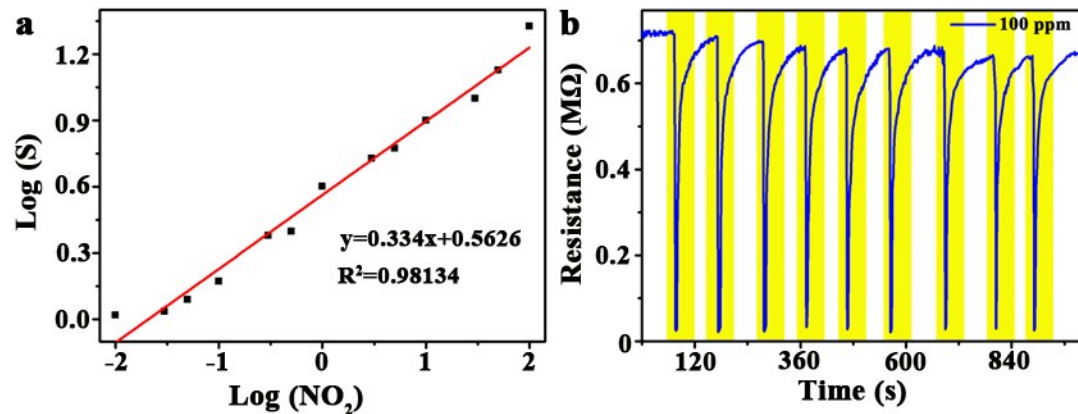

**Fig. S9** (a) The calibration curve of SnS<sub>2</sub>/aEG-III to 0.01-100 ppm NO<sub>2</sub>, (b) The reproducibility of the SnS<sub>2</sub>/aEG-III sensor upon successive exposure (9 cycles) to 100 ppm NO<sub>2</sub>.

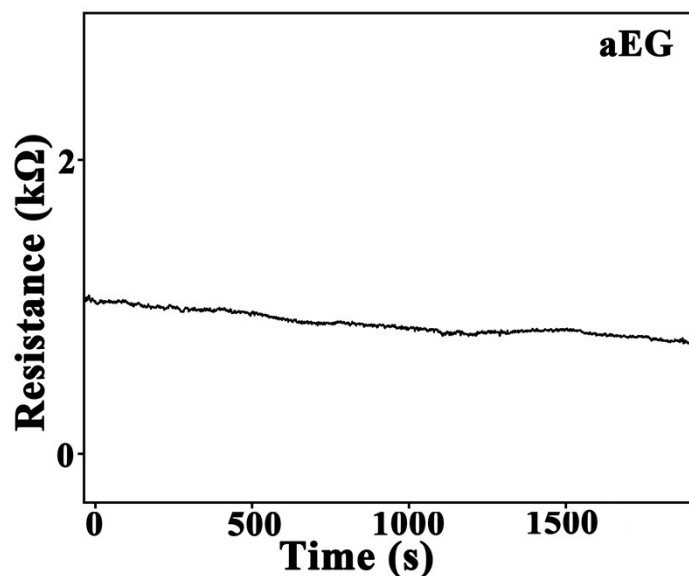

Fig. S10 Dynamical response transient of aEG to NO<sub>2</sub> gas at room temperature.

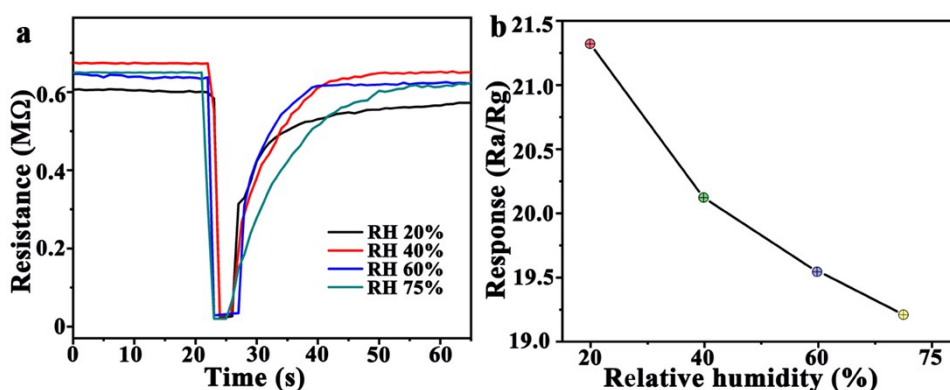

Fig. S11 (a) Response-recovery curves of the SnS<sub>2</sub>/aEG-III to 100 ppm NO<sub>2</sub> gas in different relative humidity at RT (27 °C); (b) the gas sensor response corresponding to Figure (a).

**Detail description:** The first step is to install the modified gold interdigitated electrode in the gas chamber and connect it with the external environment. Then, the chamber was washed with fresh air to remove all impurities. Next, the humidifier system was used to achieve the required humidity (relative humidity (20% - 75%)). The humidity of the system is monitored by a hygrometer. Finally, NO<sub>2</sub> gas (100 ppm) was sent to the chamber. When the resistance is balanced, the oil pump was used to purge the fresh air until the sensor resistance reaches the initial state.

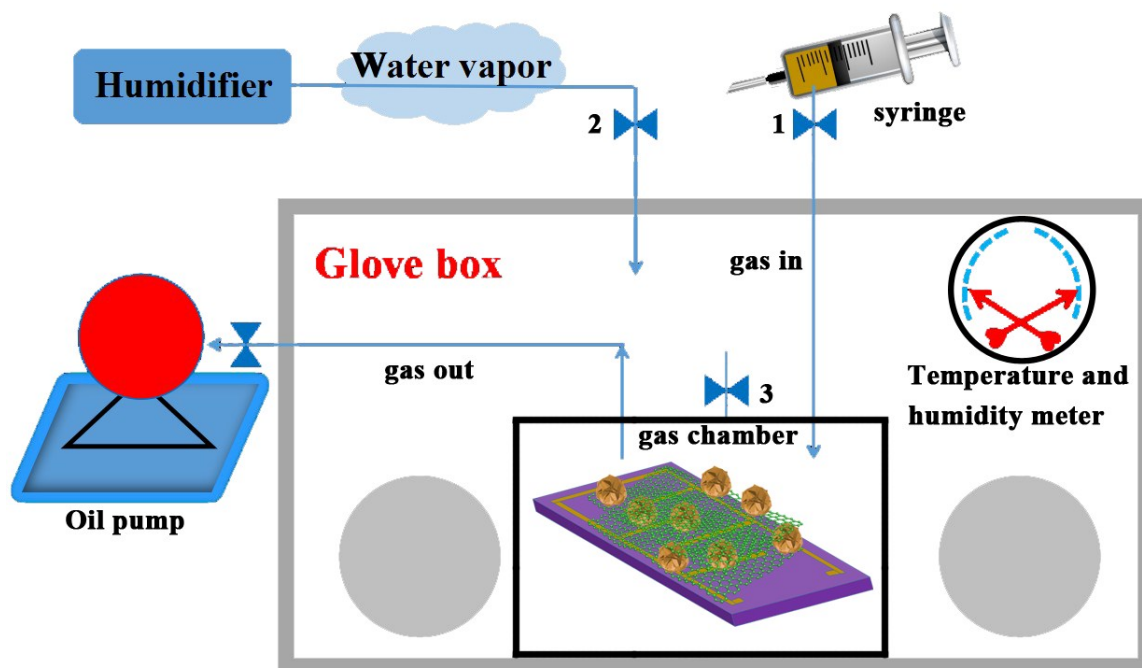

Fig. S12 A diagram of the delivery system for the gas sensing and humidity test.
